# Supplementary figures and images for: One-flask synthesis of pyrazolone thioethers involving catalyzed and uncatalyzed thioetherification pathways of pyrazolones
Source: Royal Society of Chemistry journal article supplement (doi:10.1039/c7ob01754e), 2017-01-01

$^{13}\text{C}$  NMR spectra of compound **2s** and **3a**

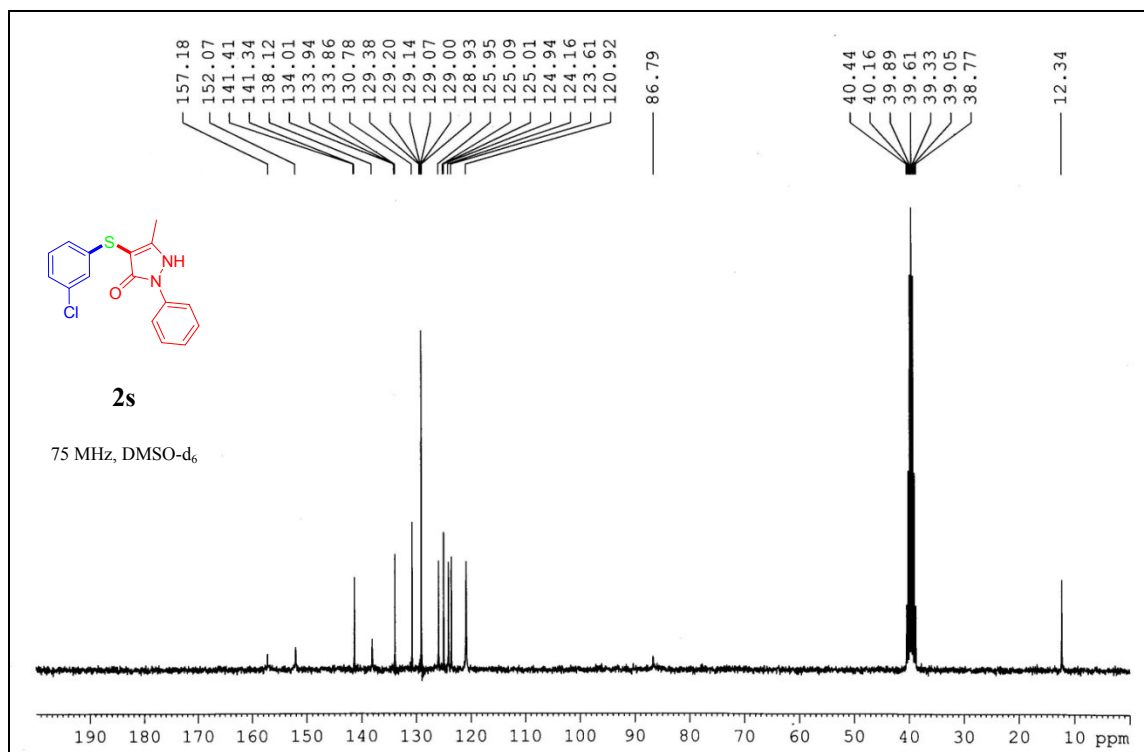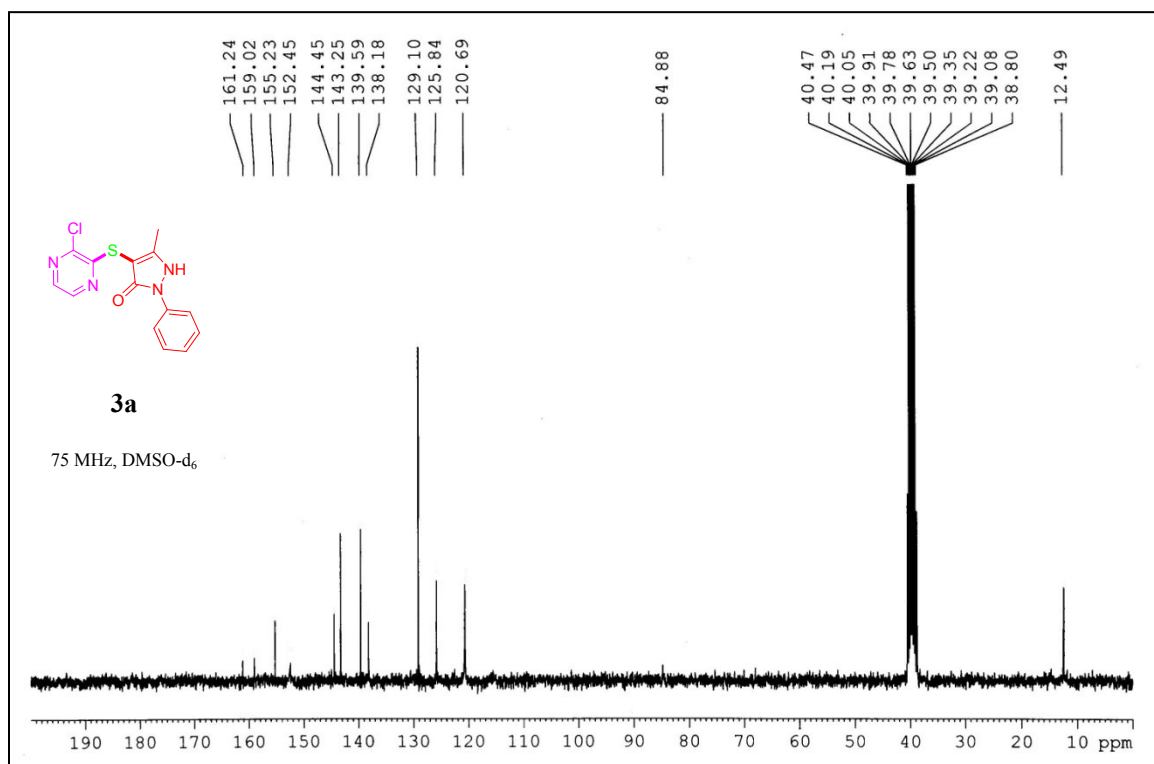

Supplement: c7ob01754e1.pdf [file c7ob01754e1.pdf]
